# Supplementary material for: Information about Human Evolution: An Analysis of News Published in Communication Media in Spanish between 2015 and 2017
Source: MDPI journal article supplement (doi:10.3390/publications9030028), 2021-07-03
Supplement: s1 [file s1]

# Information about Human Evolution: An Analysis of News Published in Communication Media in Spanish between 2015 and 2017

Jon Ander Garibi, Alvaro Antón and José Domingo Villarroel \*

Faculty of Education Bilbao, University of the Basque Country (UPV/EHU); 48940 Leioa, Spain;  
jonander.garibi@ehu.eus (J.A.G.); alvaro.anton@ehu.eus (A.A.)

\* Correspondence: txomin.villarroel@ehu.eus; Tel.: +34-94-601-75-21

The complete list of news included in the sample under study:

AFP. (2017, June 8). Hallan en Marruecos los restos del Homo Sapiens más antiguo del mundo. *eltiempo.com*. Retrieved from <http://www.eltiempo.com/vida/ciencia/homo-sapiens-mas-antiguo-del-mundo-encontrado-en-marruecos-96516>

Agencia Sinc. (2017, August 8). El orgasmo femenino: ponga fin a los mitos y sepa cómo asegurar el placer. *eleconomista.es*. Retrieved from <http://www.economi-ahoy.mx/ciencia-eAm-mx/noticias/8543312/08/17/El-orgasmo-femenino-ponga-fin-a-los-mitos-y-sepa>

Alcalde, J. (2017, May 10). Las raíces musicales del ser humano. *larazón.es*. Retrieved from <http://www.larazon.es/sociedad/ciencia/las-raices-musicales-del-ser-humano-EF15107300>

Alcalde, J. (2017, May 24). ¿Y si el ser humano no hubiera nacido en África?. *larazón.es*. Retrieved from <https://www.larazon.es/sociedad/ciencia/y-si-el-ser-humano-no-hubiera-nacido-en-africa-EG15208048>

Alcalde, J. (2017, August 9). El ADN reescribe la historia del ser humano. *larazón.es*. Retrieved from <http://www.larazon.es/sociedad/ciencia/el-adn-reescribe-la-historia-del-ser-humano-NG15754485>

Alcalde, J. (2017, September 30). ¿Cuándo surgió el humano moderno?. *larazón.es*. Retrieved from <http://www.larazon.es/sociedad/ciencia/cuando-surgio-el-humano-moderno-MA16344109>

Alós, E. (2016 September 16). «La mayoría de la gente será innecesaria en el siglo XXI». *El Periódico de Extremadura*, pp. 16.

Ansede, M. (2017, April 27). Una nueva técnica permitirá trazar el mapa de los humanos prehistóricos. *elpais.com*. Retrieved from [http://elpais.com/elpais/2017/04/27/cien-cia/1493300877\\_241731.html](http://elpais.com/elpais/2017/04/27/cien-cia/1493300877_241731.html)

Ansede, M. (2017, June 8). Así eran los primeros ‘Homo sapiens’. *El País*, pp. 24.

Arizaleta, M. (2016, October 12). El paseo de Darwin por Bilbo. *periodistadigital.com*. Retrieved from <http://www.periodistadigital.com/religion/opinion/2016/10/12/el-paseo-de-darwin-por-bilbo-iglesia-religion-dios-jesus-biblia>

Arsuaga, J. L. (2016, September 24). Misterios y problemas. *elpais.com*. Retrieved from [http://elpais.com/elpais/2016/09/23/ciencia/1474628622\\_096954.html](http://elpais.com/elpais/2016/09/23/ciencia/1474628622_096954.html)

Arsuaga, J. L. (2016, September 25). Misterios y problemas. *El País*, pp. 2-3.

Asenjo, I. (2017, October 30). Volver a los orígenes para recuperar salud. *lasprovincias.es*. Retrieved from <http://www.lasprovincias.es/sociedad/salud/volver-origenes-recuperar-20171031153521-ntrc.html>

Astorga, J. V. (2016, November 12). «No creo en la cultura del esfuerzo, sino en un profesor capaz de entusiasmar». *sur.es*. Retrieved from <http://www.diariosur.es/malaga/201611/13/creo-cultura-esfuerzo-sino-20161112220632.html>

**Publisher's Note:** MDPI stays neutral with regard to jurisdictional claims in published maps and institutional affiliations.

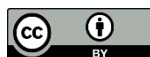

**Copyright:** © 2021 by the authors.  
Licensee MDPI, Basel, Switzerland.  
This article is an open access article distributed under the terms and conditions of the Creative Commons Attribution (CC BY) license (<http://creativecommons.org/licenses/by/4.0/>).

Astorga, J. V. (2016, November 27). «Lo de viajar a Marte es una tecnofantasia para tener entretenido al personal». *SUR*, pp. 6-7.

Aves para explorar el comportamiento humano. (2016, November 21). *ecoticias.com*. Retrieved from <http://www.ecoticias.com/naturaleza/129460/Aves-explorar-comportamiento-humano>

Balbi, M. (2017, August 4). Nick Bostrom: habla el gurú de Bill Gates, Elon Musk y Stephen Hawking. *infobae.com*. Retrieved from <http://www.infobae.com/tendencias/innovacion/2017/08/04/nick-bostrom-habla-el-guru-de-bill-gates-elon-musk-y-stephen>

Barbería, J. L. (2016, December 21). Carlos López otín: “La ciencia revela la verdadera belleza del mundo”. *El País*. Retrieved from [https://elpais.com/elpais/2016/12/21/eps/1482275152\\_148227.html](https://elpais.com/elpais/2016/12/21/eps/1482275152_148227.html)

Barrena, J. C. (2017, May 24). Científicos alemanes sitúan la cuna de la humanidad en Europa. *El Comercio*, pp. 33.

Batalla, J. (2017, September 15). Hombre de piltdown: El desopilante gran fraude arqueológico que unió al perito moreno con arthur conan doyle. *infobae.com*. Retrieved from <https://www.infobae.com/salud/ciencia/2017/09/15/hombre-de-piltdown-el-desopilante-gran-fraude-arqueologico-que-unio-al-perito-moreno-con-arthur-conan-doyle>

Bär, N. (2017, June 7). El primero de nuestro linaje: el Homo sapiens habría aparecido 100.000 años antes de lo que se pensaba. *lanacion.com*. Retrieved from <https://www.lanacion.com.ar/sociedad/el-primero-de-nuestro-linaje-el-homo-sapiens-habria-aparecido-100000-anos-antes-de-lo-que-se-pensaba-nid2031321>

Benítez, I. (2017, February 26). El origen del primer paso. *Diario de Navarra*, pp.26.

Benítez, J. & Samper, B. (2016, December 1). Inmortalidad, cyborgs y dataísmo: el futuro según Harari. *elmundo.es*. Retrieved from <http://www.elmundo.es/papel/historias/2016/12/01/583c6470e2704e4c798b458f.html>

Bermúdez de Castro: Conocer la evolución humana ayuda a entendernos. (2017, October 6). *Abc.es*. Retrieved from <http://agencias.abc.es/agencias/noticia.asp?noticia=2629069>

Bernardo, Á. (2016, September 21). El vídeo que explica cómo salimos de África desde que apareció el ser humano. *hipertextual.com*. Retrieved from <https://hipertextual.com/2016/09/africa-migracion-homo-sapiens-clima>

Calvo, O. (2017, November 29). Sí, eres un ciborg aunque no lo sepas. *elmundo.es*. Retrieved from <http://www.elmundo.es/vida-sana/bienestar/2017/11/29/5a1d5fda268e3e43308b4642.html>

Cantazaro, M. (2016, October 10). La violencia a lo largo del árbol evolutivo humano. *El Periódico Mediterráneo*, pp. 28.

Carlin, J. (2017, May 15). Gorilas en política. *El País*, pp. 10.

Casamor, A. (2017, May 10). ¿Puede el humor salvarnos de Trump?. *lifeandstyle.mx*. Retrieved from <http://lifeandstyle.mx/entretenimiento/2017/05/10/puede-el-humor-salvarnos-de-trump>

Cebrián, M. (2017, october 10). Tamajón presume de *Homo sapiens*. *ABC*, pp. 72.

Celis, R. (2017, March 17). Creatividad y evolución. *eldia.es*. Retrieved from <http://eldia.es/2017-03-17/criterios/11-Creatividad-evolucion.htm>

Celorio, Á. (2016, October 20). Sexo con robots: bienvenidos al futuro. *elmundo.es*. Retrieved from <http://www.elmundo.es/papel/futuro/2016/10/20/58050bc822601d3c278b45c4.html>

Cerdán, M. Á. (2017, June 26). ¿Homo Deus?. *elmundo.es*. Retrieved from <http://www.elmundo.es/comunidad-valenciana/castellon/2017/06/26/5950b4e8e5fdeaaf4a8b4583.html>

Cerebro: un ménage à trois muy particular. (2017, April 16). *lacapital.com*. Retrieved from <https://www.lacapital.com.ar/mas/cerebro-un-menage-trois-muy-particular-n1375989.html>

Chaparro, L. (2017, November 07). Nuestra especie, al ritmo de la evolución. *heraldo.es*. Retrieved from <http://www.heraldo.es/noticias/suplementos/tercer-milenio/investigacion/2017/11/07/nuestra-especie-ritmo-evolucion-1206200-2121029.html>

Chile y el mundo. crónica de ruperto concha: Pensamiento sensorial. (2017, May 02). *kaosenlared.net*. Retrieved from <http://kaosenlared.net/chile-y-el-mundo-cronica-de-ruperto-concha-pensamiento-sensorial/>

Científicos colaboraron en serie “En un millón de años”: un retrato de la vida en el futuro. (2017, August 31). *elmostrador.cl*. Retrieved from <http://www.elmostrador.cl/cultura/2017/08/31/cientificos-colaboraron-en-serie-en-un-millon-de-anos-un-retrato-de-la-vida>

Científicos descartan que los enigmáticos hobbits evolucionaran del ancestro de los humanos. (2017, April 24). *emol.com*. Retrieved from <https://www.emol.com/noticias/Tecnologia/2017/04/24/855435/Cientificos-descartan-que-los-enigmaticos-hobbits-evolucionaran-del-ancestro-de-los-humanos.html>

Collín, I. (2017, June 13). Menéndez: Los grandes retos ya no se abordan con una única tecnología. *lne.es*. Retrieved from [https://www.lne.es/oviedo/2017/06/13/menendez-grandes-retos-abordan-unica/2119752.html?utm\\_medium=rss](https://www.lne.es/oviedo/2017/06/13/menendez-grandes-retos-abordan-unica/2119752.html?utm_medium=rss)

Constain, J. E. (2017, August 24). ¿Teoría de la evolución?. *eltiempo.com*. Retrieved from <http://www.eltiempo.com/opinion/columnistas/juan-esteban-constain/teoria-de-la-evolucion-evolucion-de-la-humanidad>

Corbella, J. (2017, May 10). Un humano arcaico que vivió en tiempos recientes desconcierta a los científicos. *La Vanguardia*, pp. 31.

Corbella, J. (2017, June 7). Los cuatro episodios clave de la evolución humana. *la-vanguardia.com*. Retrieved from <http://www.lavanguardia.com/ciencia/20170607/423246117933/guia-evolucion-homo-sapiens.html>

Corbella, J. (2017, June 7). Descubiertos los fósiles de los primeros ‘Homo sapiens’. *lavanguardia.es*. Retrieved from <http://www.lavanguardia.com/ciencia/20170607/423244535293/primeros-homo-sapiens.html>

Corbella, J. (2017, June 8). Descubiertos los fósiles de los primeros ‘Homo sapiens’. *La Vanguardia*, pp. 26.

Córdoba, M. (2017, May 27). Los principales productos del siglo XXI serán cuerpos, cerebros y mentes. *latercera.com*. Retrieved from <http://www.latercera.com/noticia/yuval-noah-harari-los-principales-productos-del-siglo-xxi-seran-cuerpos-cerebros-mentes>

Córdoba, M. (2017, June 10). El enigma de los primeros americanos. *latercera.com*. Retrieved from <http://www.latercera.com/noticia/enigma-los-primeros-americanos/>

Cortés, C. (2017, August 23). De animales a dioses. *Elinformador.com*. Retrieved from <http://opinion.informador.com.mx/Columnas/2017/08/23/de-animales-a-dioses/>

¿Cuántos sapiens hubo?. (2016, October 13). *opinionmalaga.com*. Retrieved from <http://blogs.opinionmalaga.com/palabras-bosques/2016/10/13/%c2%bfcuantos-sapiens-hubo/>

de Ávila, J. J. (2017, october 14). El ser humano, cada vez más artificial. *milenio.com*. Retrieved from <https://www.milenio.com/cultura/el-ser-humano-cada-vez-mas-artificial>

de francisco, M. R. (2017, June 22). Crónicas del futuro. *eltiempo.com*. Retrieved from <https://www.eltiempo.com/opinion/columnistas/margarita-rosa-de-francisco/cronicas-del-futuro-paul-amadeus-dienach-101462>

de Jorge, J. (2016, September 29). Caín está en nuestras raíces. *ABC*, pp. 44.

de Jorge, J. (2016, December 30). Diez capítulos de la Prehistoria que antes no conocíamos. *abc.es*. Retrieved from [http://www.abc.es/ciencia/abci-diez-capitulos-prehistoria-antes-no-conociamos-201612291441\\_noticia.html](http://www.abc.es/ciencia/abci-diez-capitulos-prehistoria-antes-no-conociamos-201612291441_noticia.html)

de Jorge, J. (2017, March 2). Un misterioso pariente de los neandertales, hallado en China. *abc.es*. Retrieved from [http://www.abc.es/ciencia/abci-misterioso-pariente-neandertales-hallado-china-201703022001\\_noticia.html](http://www.abc.es/ciencia/abci-misterioso-pariente-neandertales-hallado-china-201703022001_noticia.html)

- de Jorge, J. (2017, July 19). Y el hombre llegó a Australia.... *eleconomista.es*. Retrieved from [http://www.abc.es/ciencia/abci-hombre-llego-australia-antes-creia-201707192041\\_noticia.html#ns\\_campaign=mod-abc](http://www.abc.es/ciencia/abci-hombre-llego-australia-antes-creia-201707192041_noticia.html#ns_campaign=mod-abc)
- de Juan, J. (2017, April 22). El misterioso Hombre de Flores pudo llegar de África. *abc.es*. Retrieved from [http://www.abc.es/ciencia/abci-misterioso-hombre-flores-pudo-llegar-africa-201704220232\\_noticia.html](http://www.abc.es/ciencia/abci-misterioso-hombre-flores-pudo-llegar-africa-201704220232_noticia.html)
- de la cal, L. (2017, August 20). La primera 'familia' del Homo sapiens. *El Mundo*, pp. 3-4.
- de la fuente, A. (2017, June 26). «La ciencia ficción está viviendo una edad dorada». *El Correo de Burgos*, pp. 19.
- De las cuatro patas a la maratón: la evolución como aliada del 'runner'. (2016, September 30). *elconfidencial.com*. Retrieved from [http://www.elconfidencial.com/alma-corazon-vida/running/2016-09-30/parto-running-evolucion-mujeres\\_1267479/](http://www.elconfidencial.com/alma-corazon-vida/running/2016-09-30/parto-running-evolucion-mujeres_1267479/)
- De Miguel: El hombre se caracterizó por tener una evolución muy rápida. (2016, October 6). *laregion.es*. Retrieved from <http://www.laregion.es/articulo/foro-region/miguel-hombre-caracterizo-tener-evolucion-muy-rapida/20161006074506654100>
- De Miguel, M. (2017, June 8). Los fósiles de 'homo sapiens' más antiguos. *El mundo*, pp. 42.
- Del fuego a la medicina: Estrenan serie que responde las interrogantes de la evolución del ser humano. (2017, March 19). *emol.com*. Retrieved from <https://www.emol.com/noticias/Espectaculos/2017/03/17/849993/Del-fuego-a-la-medicina-Estrenan-serie-que-responde-las-interrogantes-de-la-evolucion-del-ser-humano.html>
- del Valle, I. (2017, April 8). Treinta espíritus. *La Voz de Avilés*, pp. 8.
- Descubiertos en Tamajón (Guadalajara) los restos más antiguos de Homo Sapiens en la Meseta. (2017, September 18). *eleconomista.es*. Retrieved from <http://ecodiario.eleconomista.es/espana/noticias/8614823/09/17/Descubiertos-en-Tamajon-Guadalajara-los-restos-mas>
- Domínguez, A. (2017, June 8). La temperatura de la cueva de Altamira sube entre medio y un grado. *El correo*, pp. 55.
- Domínguez, A. (2017, July 24). Un resto neandertal cierra el círculo de la evolución humana en Atapuerca. *heraldo.es*. Retrieved from <https://www.heraldo.es/noticias/sociedad/2017/07/24/un-resto-neandertal-cierra-circulo-evolucion-humana-atapuerca-1188478-310.html>
- Domínguez, N. (2017, March 14). Un cráneo agujereado por un martillo hidráulico 400.000 años después de la muerte. *elpais.com*. Retrieved from [https://elpais.com/elpais/2017/03/13/ciencia/1489430150\\_143433.html#ref=rss=simple=link](https://elpais.com/elpais/2017/03/13/ciencia/1489430150_143433.html#ref=rss=simple=link)
- Domínguez, N. (2017, April 26). Un estudio sugiere que los neandertales fueron los primeros en colonizar América. *elpais.com*. Retrieved from [http://elpais.com/elpais/2017/04/26/ciencia/1493225013\\_884467.html](http://elpais.com/elpais/2017/04/26/ciencia/1493225013_884467.html)
- Domínguez, N. (2017, June 29). ¿Tiene más fuerza un chimpancé que un humano?. *elpais.com*. Retrieved from [https://elpais.com/elpais/2017/06/26/ciencia/1498505498\\_712497.html#ref=rss=simple=link](https://elpais.com/elpais/2017/06/26/ciencia/1498505498_712497.html#ref=rss=simple=link)
- Durán Flores, M. (2016, November 26). El planeta de los simios. *vanguardia.com*. Retrieved from <http://www.vanguardia.com.mx/articulo/el-planeta-de-los-simios>
- EFE. (2016, September 25). Arsuaga: "El cerebro humano está sediento de historias porque busca cultura". *eldiario.es*. Retrieved from [https://www.eldiario.es/tecnologia/Arsuaga-cerebro-sediento-historias-cultura\\_0\\_562744041.html](https://www.eldiario.es/tecnologia/Arsuaga-cerebro-sediento-historias-cultura_0_562744041.html)
- EFE. (2016, November 14). Cercanía de Neandertales y humanos permitió adaptación. *informador.com*. Retrieved from <http://www.informador.com.mx/tecnologia/2016/691864/6/cercania-de-neandertales-y-humanos-permitio-adaptacion.htm>
- EFE. (2016, December 12). Editan un libro de recetas basadas en la dieta de los habitantes de Atapuerca. *Diari*, pp. 48.

EFE. (2016, November 11). El encuentro entre el homo sapiens y el hombre de Neandertal permitió la adaptación fuera de África. *emol.com*. Retrieved from <http://www.emol.com/noticias/Tecnologia/2016/11/11/830722/El-encuentro-entre-el-homo-sapiens-y-el-hombre-de-Neandertal>

EFE. (2016, December 12). Eudald Carbonell y Pilarín Bayés acercan la evolución a los niños. *Diari*, pp.48.

EFE. (2017, April 17). Escritora detalla la historia de la evolución en Europa a través de su ADN. *emol.com*. Retrieved from <https://www.emol.com/noticias/Tecnologia/2017/04/17/854539/Escritora-detalla-la-historia-de-la-evolucion-en-Europa-a-traves-de-su-ADN.html>

EFE. (2017, April 18). Novela sobre ADN relata la evolución de seres humanos. *milenio.com*. Retrieved from [http://www.milenio.com/cultura/novela-karin\\_bojs-adn-evolucion-humanos\\_0\\_940705927.html](http://www.milenio.com/cultura/novela-karin_bojs-adn-evolucion-humanos_0_940705927.html)

El ADN neandertal aún influye en la expresión del gen humano. (2017, February 24). *canarias7.es*. Retrieved from [https://www.canarias7.es/hemeroteca/el\\_adn\\_neandertal\\_aun\\_influye\\_en\\_la\\_expresion\\_del\\_gen\\_humano-NDCSN454669](https://www.canarias7.es/hemeroteca/el_adn_neandertal_aun_influye_en_la_expresion_del_gen_humano-NDCSN454669)

El Arkeologi Museoa de Bizkaia acoge hasta octubre la muestra 'Atapuerca: Cráneo 4'. (2017, May 18). *telemadrid.es*. Retrieved from <http://www.telemadrid.es/noticias/sociedad/Arkeologi-Museoa-Bizkaia-Atapuerca-Craneio-0-1903909597--20170518033533.html>

El Cabildo celebra una nueva edición del curso Detectives de la Naturaleza. (2017, May 9). *laopinion.es*. Retrieved from [http://www.laopinion.es/cultura/2017/05/09/cabildo-celebra-nueva-edicion-curso/773681.html?utm\\_source=rss](http://www.laopinion.es/cultura/2017/05/09/cabildo-celebra-nueva-edicion-curso/773681.html?utm_source=rss)

El fascinante hallazgo del primer 'Homo sapiens' que reescribe lo que se sabe del origen humano. (2017, June 8). *elmostrador.cl*. Retrieved from <https://www.elmostrador.cl/noticias/mundo/2017/06/08/el-fascinante-hallazgo-del-primer-homo-sapiens-que-reescribe-lo-que-se-sabe-del-origen-humano/>

El fósil que cambió todo. (2017, October 16). *vanguardia.com*. Retrieved from <https://vanguardia.com.mx/articulo/el-fosil-que-cambio-todo>

El 'homo' más temprano tuvo sus inicios en ambientes herbáceos. (2017, May 16). *europapress.es*. Retrieved from <https://www.europapress.es/ciencia/ruinas-y-fosiles/noticia-homo-mas-temprano-tuvo-inicios-ambientes-herbaceos-20170515165934.html>

El Homo sapiens convivió con el Homo naledi al sur de Africa. (2017, May 10). *lacapital.com*. Retrieved from <http://www.lacapital.com.ar/informacion-gral/el-homo-sapiens-convivio-el-homo-naledi-al-sur-africa-n1393364.html>

El homo sapiens de Tamajón. (2017, September 18). *latribunadealbacete.es*. Retrieved from <http://www.latribunadealbacete.es/Noticia/ZCFEBE8E4-A9C0-0DB1-085A884B289042DE/El-homo-sapiens-de-Tamajon>

El homo sapiens envejece 100.000 años. (2017, June 7). *diariosur.es*. Retrieved from <https://www.diariosur.es/sociedad/ciencia/201706/07/homo-sapiens-envejece-20170607191028-ntrc-rc.html>

El homo sapiens es mucho más agresivo que cualquier otra especie. (2016, October 5). *laregion.es*. Retrieved from <http://www.laregion.es/articulo/foro-region/homo-sapiens-mucho-mas-agresivo-cualquier-otra-especie/20161005080615653870>

El Homo sapiens vivió mucho antes de lo que se pensaba. (2017, June 7). *eluniversal.com*. Retrieved from <https://www.eluniversal.com.mx/articulo/ciencia-y-salud/2017/06/7/el-homo-sapiens-vivio-mucho-antes-de-lo-que-se-pensaba>

El humano es violento por su propia naturaleza animal. (2016, September 29). El humano es violento por su propia naturaleza animal. *lavozdegacia.es*. Retrieved from [http://www.lavozdegacia.es/noticia/sociedad/2016/09/29/hombre-violento-naturaleza-animal/0003\\_201609G29P32996](http://www.lavozdegacia.es/noticia/sociedad/2016/09/29/hombre-violento-naturaleza-animal/0003_201609G29P32996)

El mundo en 2050, un evento para debatir el destino del ser humano. (2017, November 2). *elpais.com*. Retrieved from [https://elpais.com/elpais/2017/10/30/ciencia/1509355893\\_322339.html#?ref=rss=simple=link](https://elpais.com/elpais/2017/10/30/ciencia/1509355893_322339.html#?ref=rss=simple=link)

El origen del ser humano es más antiguo de lo que se pensaba. (2017, June 7). *eluniversal.com*. Retrieved from <https://www.eluniversal.com.mx/articulo/mundo/2017/06/7/el-origen-del-ser-humano-es-mas-antiguo-de-lo-que-se-pensaba>

El pensamiento humano surgió hace 1.8 millones de años. (2017, May 10). *jornada.unam.mx*. Retrieved from <http://www.jornada.unam.mx/ultimas/2017/05/10/el-pensamiento-humano-surgio-hace-1-8-millones-de-anos>

El último antepasado común de simios y humanos era como un gibón. (2017, October 13). *ecoticias.com*. Retrieved from <http://www.ecoticias.com/naturaleza/175658/El-ultimo-antepasado-comun-de-simios-y-humanos-era-como-un-gibon>

Enguix, S. (2017, May 2). ¿Qué piensan los trabajadores de los robots?. *lavanguardia.es*. Retrieved from <http://www.magazinedigital.com/historias/reportajes/que-piensen-los-trabajadores-los-robots>

Estudio arroja nueva luz sobre la expansión del género homo desde África. (2017, July 6). *elboletín.com*. Retrieved from <https://www.elboletín.com/noticia/151195/contraportada/estudio-arroja-nueva-luz-sobre-la-expansion-del-genero-homo-desde-africa.html>

Faílde, J. M. (2016, October 26). ¿Es el ser humano tan racional como se le apoda?. *laregion.es*. Retrieved from <http://www.laregion.es/articulo/xornal-escolar/ser-humano-tan-racional-apoda/20161026152114658959.html>

Fernández Aguilar, A. (2017, September 2). Soy un algoritmo. *La Verdad*, pp. 28.

Fernández, J. L. (2017, May 20). El hombre que odiaba a los percebes. *El diario montañas*, pp. 10.

Festival Internacional de Cine Arqueológico del Bidasoa 2017. (2017, November 25). *diariavasco.com*. Retrieved from <http://agenda.diariavasco.com/evento/festival-internacional-de-cine-arqueologico-del-bidasoa-2017-582485.html>

Fósil marroquí de Yebel Irhud confirma el origen panafricano del Homo Sapiens. (2017, June 9). *ecodiario.es*. Retrieved from <https://ecodiario.economista.es/ciencia/noticias/8419675/06/17/Fosil-marroqui-de-Yebel-Irhud-confirma-el-origen-panafricano-del-Homo-Sapiens.html>

García-Cuadrado, G. (2016, December 12). El Calendario Cósmico: Breve homenaje a Carl Sagan. *rtve.es*. Retrieved from <http://www.rtve.es/television/20160928/calendario-cosmico-breve-homenaje-carl-sagan/1415803.shtml>

García, R. R. (2017, June 8). El ser humano nació en Marruecos. *La Voz de Galicia*, pp. 31.

García, R. R. (2017, June 8). El ser humano nació en Marruecos. *lavozdeasturias.es*. Retrieved from <http://www.lavozdeasturias.es/noticia/sociedad/2017/06/07/humano-nacio-marruecos/00031496855069248679628.htm>

Garmendia, A. (2017, May 18). Arkeologi Museoa narra la evolución humana con un cráneo de Atapuerca. *Deia*, pp. 60-61.

Garrido Málaga, R. (2016, October 16). A la busca del Neandertal. *malagahoy.es*. Retrieved from <http://www.malagahoy.es/article/malaga/2390688/la-busca/neandertal.html>

Gámez, L. A. (2017, April 27). ¿Había humanos en América hace 130.000 años?. *El Correo*, pp. 50.

Gamo, R. (2017, April 4). Generación 'Homo Sapiens': un viaje hacia nuestros orígenes. *eldiario.es*. Retrieved from [http://www.eldiario.es/clm/Generacion-Homo-Sapiens-viaje-origenes\\_0\\_632386968.html](http://www.eldiario.es/clm/Generacion-Homo-Sapiens-viaje-origenes_0_632386968.html)

Giménez Barbat, M. T. (2017, July 21). Breve historia de todos los que han vivido. *El Cultural*, pp. 22.

Gómez, J. E. (2017, January 5). Niegan la evolución paralela del cerebro y los dientes de los humanos. *IDEAL*, pp. 58.

Guaycochea de Onofri, R. (2016, December 17). Del perito moreno a la colonia en marte. *losandes.com*. Retrieved from <http://www.losandes.com.ar/article/del-perito-moreno-a-la-colonia-en-marte>

Hallaron los fósiles más antiguos del homo sapiens: cómo altera la historia del hombre moderno. (2017, June 8). *infobae.com*. Retrieved from

<http://www.infobae.com/tendencias/2017/06/07/hallaron-los-fosiles-mas-antiguos-del-homo-sapiens-como-altera-la-historia>

Hernández Fernández, S. (2017, August 12). Antropoceno, ¿sexta gran extinción?. *El Periódico Extremadura*, pp. 22.

Hernández, P. (2017, June 1). La barbilla, un misterio prominente. *Muy*, pp. 93.

'Homo naledi' es más reciente de lo pensado: 230.000/330.000 años. (2017, May 9). *europapress.es*. Retrieved from <https://www.europapress.es/ciencia/ruinas-y-fosiles/noticia-homo-naledi-mas-reciente-pensado-230000-300000-anos-20170509101736.html>

Homo roboticus, una especulación sobre el futuro de la evolución humana. (2017, November 24). *eluniversal.com*. Retrieved from <http://www.eluniversal.com.mx/ciencia-y-salud/ciencia/homo-roboticus-una-especulacion-sobre-el-futuro-de-la-evolucion>

Homo Sapiens se reprodujo con ancestro arcaico desconocido. (2017, July 25). *excelsior.com*. Retrieved from <http://www.excelsior.com.mx/global/2017/07/25/1177685>

Homo sapiens son responsables de la desaparición de los hobbits. (2016, September 23). *vanguardia.com*. Retrieved from <http://www.vanguardia.com.mx/articulo/homo-sapiens-son-responsables-de-la-desaparicion-de-los-hobbits>

Huellas de 5,7 millones de años desafían la evolución. (2017, September 3). *laprovincia.es*. Retrieved from <https://www.laprovincia.es/sociedad/2017/09/03/huellas-5-millones-anos-desafian/974298.html>

Ibañez, A. (2017, October 6). «Homo Deus»: contra el hombre. *lavozdigital.es*. Retrieved from [http://www.lavozdigital.es/cultura/cultural/abci-homo-deus-contra-hombre-201710060044\\_noticia.html](http://www.lavozdigital.es/cultura/cultural/abci-homo-deus-contra-hombre-201710060044_noticia.html)

Inaugurada la muestra Atapuerca: Cráneo 4 en el Arkeologi Museoa. (2017, May 17). *deia.com*. Retrieved from <https://www.deia.eus/2017/05/17/bizkaia/inaugurada-la-muestra-atapuerca-craneo-4-en-el-arkeologi-museoa-#Loleido>

Iriberry, A. (2016, December 14). Los hombres perdieron el hueso del pene por monógamos. *elespanol.com*. Retrieved from [http://www.elespanol.com/ciencia/salud/20161214/178232636\\_0.html](http://www.elespanol.com/ciencia/salud/20161214/178232636_0.html)

Izquierdo Yusta, C. (2017, April 4). 'Origen y evolución del hecho religioso'. *periodistadigital.com*. Retrieved from <https://www.periodistadigital.com/cultura/religion/20170417/origen-evolucion-hecho-religioso-noticia-689400790310/>

Jordá, E. (2017, July 12). Una nueva excavación en la Cueva del Ángel busca restos preneandertales. *eldiadecordoba.es*. Retrieved from [http://www.eldiadecordoba.es/ocio/excavacion-Cueva-Angel-restos-preneandertales\\_0\\_1153384706.html](http://www.eldiadecordoba.es/ocio/excavacion-Cueva-Angel-restos-preneandertales_0_1153384706.html)

José María Bermúdez (codirector excavaciones Atapuerca): "La selección natural ha permitido que siga habiendo violencia" (2017, october 2). *eleconomista.es*. Retrieved from <http://www.latribunadetoledo.es/Noticia/ZCFEBE8E4-A9C0-0DB1-085A884B289042DE/El-homo-sapiens-de-Tamajon>

Kusko, F. (2017, September 10). La edición de la vida. el inquietante poder de "reescribir" los genes. *lanacion.com*. Retrieved from <https://www.lanacion.com.ar/2060732-la-edicion-de-la-vida-el-inquietante-poder-de-reescribir-los-genes>

La artrosis es un efecto colateral de la lucha por la supervivencia del ser humano. (2017, July 3). *abc.es*. Retrieved from [https://www.abc.es/salud/enfermedades/abci-artrosis-efecto-colateral-lucha-supervivencia-humano-201707031713\\_noticia.html](https://www.abc.es/salud/enfermedades/abci-artrosis-efecto-colateral-lucha-supervivencia-humano-201707031713_noticia.html)

La Cueva Negra se consolida como un yacimiento clave a nivel mundial para el estudio de los primeros homínidos. (2017, July 17). *ecodiario.es*. Retrieved from <https://ecodiario.eleconomista.es/espana/noticias/8502560/07/17/La-Cueva-Negra-se-consolida-como-un-yacimiento-clave-a-nivel-mundial-para-el-estudio-de-los-primeros-hominidos.html>

La cuna del hombre podría estar en Marruecos, no en Etiopía como se creía hasta ahora (2017, october 26). *20minutos.es*. Retrieved from <http://www.20minutos.es/noticia/3170430/0/cuna-hombre-marruecos-etipia/>

La dieta de nuestros ancestros era más rica y variada de lo que se creía. (2016, November 20). *laopinion.es*. Retrieved from <http://www.laopinion.es/sociedad/2016/11/20/dieta-ancestros-rica-variada-creia/725370.html>

La filosofía también es ecológica. (2017, May 26). *larazon.es*. Retrieved from <http://www.larazon.es/cultura/libros/la-filosofia-tambien-es-ecologica-FE15228397>

La salud dental del hombre primitivo era mucho mejor que la del actual. (2016, December 16). Retrieved from <http://www.noticiasalud.com/cuerpo2821.html>

La tecnología que cambiará nuestra vida. (2017, June 3). *laopiniondemalaga.es*. Retrieved from [http://www.laopiniondemalaga.es/vida-y-estilo/tecnologia/2017/06/03/tecnologia-cambiara-vida/935007.html?utm\\_source](http://www.laopiniondemalaga.es/vida-y-estilo/tecnologia/2017/06/03/tecnologia-cambiara-vida/935007.html?utm_source)

Las verdaderas razones por las que el parto humano es tan doloroso y peligroso. (2016, December 30). *elmostrador.cl*. Retrieved from <http://www.elmostrador.cl/vida-en-linea/2016/12/30/las-verdaderas-razones-por-las-que-el-parto-humano-es-tan-doloroso>

Lastra Escobedo, J. (2016, October 2). En busca de la clave del cerebro humano. *El Diario Montañés*, pp. 2-3.

Lagar, E. (2016, December 19). El hombre fiel pierde el hueso del pene. *diariodeibiza.es*. Retrieved from [https://www.diariodeibiza.es/opinion/2016/12/19/hombre-fiel-pierde-hueso-pene/885547.html?utm\\_source=rss](https://www.diariodeibiza.es/opinion/2016/12/19/hombre-fiel-pierde-hueso-pene/885547.html?utm_source=rss)

Lagar, E. (2017, February 26). Llevo un neandertal dentro y él evita que me vuelva loco. *lne.es*. Retrieved from [http://www.lne.es/sociedad/2017/02/26/llevo-neandertal-evita-vuelva-loco/2064119.html?utm\\_medium=rss](http://www.lne.es/sociedad/2017/02/26/llevo-neandertal-evita-vuelva-loco/2064119.html?utm_medium=rss)

Lastra Escobedo, J. (2016, October 23). La biodiversidad se reescribe en El Pendo. *El Diario Montañés*, pp. 2-3.

Ligero, M. (2017, September 2). Machistas, homófobos, racistas y violentos: ¿aún somos solo un mono capaz de dibujar?. *Vanityfair.es*. Retrieved from <http://www.revista-vanityfair.es/actualidad/articulos/el-mono-desnudo-demond-morris-ensayo-polemica/25898>

Lo mejor de la ciencia española en 2016. (2016, December 31). *Laprovincia.es*. Retrieved from <http://www.laprovincia.es/sociedad/2016/12/31/mejor-ciencia-espanola-2016/895434.html>.

Lomazzi, C. (2017, June 27). El mar de Córdoba y otras sorprendentes historias de la geología argentina. *infobae.com*. Retrieved from <https://www.infobae.com/salud/ciencia/2017/06/27/el-mar-de-cordoba-y-otras-sorprendentes-historias-de-la-geologia-argentina/>

López, L. M. (2017, March 31). El síndrome Ovni. *eltiempo.com*. Retrieved from <http://blogs.eltiempo.com/alternativa-extraterrestre/2017/03/31/el-sindrome-ovni/>

Los diez libros de empresa de 2016, según los empresarios. (2016, December 18). *elconfidencial.com*. Retrieved from [https://www.elconfidencial.com/alma-corazon-vida/2016-12-18/10-libros-empresa-2016-segun-los-lideres-empresariales-espanoles\\_1305179/](https://www.elconfidencial.com/alma-corazon-vida/2016-12-18/10-libros-empresa-2016-segun-los-lideres-empresariales-espanoles_1305179/)

Los fósiles más antiguos de 'Homo sapiens' revolucionan el origen del ser humano moderno. (2017, June 7). *elmundo.es*. Retrieved from <http://www.elmundo.es/ciencia-y-salud/ciencia/2017/06/07/5937e81b22601d907b8b45b5.html>

Los fósiles más antiguos de nuestra especie están en Marruecos. (2017, June 8). *elboletín.com*. Retrieved from <https://www.elboletin.com/noticia/150126/contraportada/los-fosiles-mas-antiguos-de-nuestra-especie-estan-en-marruecos.html>

Madridejos, A. (2017, June 11). Los científicos siguen ahondando en el origen africano del 'Homo sapiens'. *Diario Córdoba*, pp. 51.

Malvido, G. (2017, November 9). Tenemos que aprender a vivir con lo que necesitamos, como hacían los antiguos. *La Opinión*, pp. 11.

Marcos, A. (2016, September 29). Eudald Carbonell: Tengo más esperanza en el futuro que fe en el ser humano. *lavanguardia.com*. Retrieved from <http://www.lavanguardia.com/ciencia/ciencia-cultura/20160929/41663073187/eudald-carbonell-futuro-esperanza-fe-humanos>



Marín, H. (2017, April 10). Estómago, cerebro y metáforas. *levante-emv.com*. Retrieved from <http://www.levante-emv.com/opinion/2017/04/10/estomago-cerebro-metaforas/1552828.html>

Martín, A. (2017 November 3). Alumnos del CRA Abadengo visitan la exposición de la Evolución humana en la Upsa. *diariosalamanca.es*. Retrieved from <http://salamancartvaldia.es/not/131641/alumnos-cra-abadengo-visitacion-exposicion-evolucion-humana-upsa/>

Martínez Ron, A. (2017, October 25). Nuestros cerebros no crecerán en macetas. *vozpopuli.com*. Retrieved from [http://www.vozpopuli.com/altavoz/next/cerebros-creceran-macetas\\_0\\_1066694699.html](http://www.vozpopuli.com/altavoz/next/cerebros-creceran-macetas_0_1066694699.html)

Más de mil estudiantes se zambullen en la ciencia a través de la Universidad de Navarra. (2017, November 14). *navarra.com*. Retrieved from <http://navarra.elespanol.com/articulo/sociedad/mil-estudiantes-semana-ciencia-tecnologia-universidad-navarra-imposible>

Mediavilla, D. (2017, May 22). Un polémico candidato a ser el primer miembro del linaje humano. *elpaís.com*. Retrieved from [http://elpais.com/elpais/2017/05/22/ciencia/1495472412\\_212902.html#?ref=rss=simple=link](http://elpais.com/elpais/2017/05/22/ciencia/1495472412_212902.html#?ref=rss=simple=link)

Mediavilla, D. (2017, November 15). La especie que quiere acabar con la evolución. *elpaís.com*. Retrieved from [https://elpais.com/elpais/2017/11/08/ciencia/1510168469\\_737727.html](https://elpais.com/elpais/2017/11/08/ciencia/1510168469_737727.html)

Medina, M. (2017, July 12). 'La guerra del planeta de los simios': y el ser humano cavó su propia tumba. *elconfidencial.com*. Retrieved from [http://www.elconfidencial.com/cultura/cine/2017-07-12/guerra-planeta-simios-woody-harrelson\\_1412676/](http://www.elconfidencial.com/cultura/cine/2017-07-12/guerra-planeta-simios-woody-harrelson_1412676/)

Medrano, D. (2017, September 24). «El próximo paso de la evolución humana puede ser tecnológico». *El comercio*, pp. 7.

Melado Prado, A. (2016, November 4). La tecnología al servicio del hombre. *ABC*, pp. 18.

Merino, I. (2017, November 26). El “Homo mobilis” en la era de la velocidad. *El País*, pp. 2.

Montes, A. (2017, September 30). Un relato de errores interminables. *La Opinión de Tenerife*, pp. 6-7.

Montes, S. (2016, September 29). El ser humano es violento por naturaleza. *as.com*. Retrieved from [http://as.com/tikitakas/2016/09/29/portada/1475176150\\_381064.html](http://as.com/tikitakas/2016/09/29/portada/1475176150_381064.html)

Nava, A. (2017, November 9). Perros: amigos del hombre, enemigos en la conservación del jaguar y el puma. *econoticias.com*. Retrieved from <https://www.ecoticias.com/eco-america/176784/Perros-amigos-del-hombre-enemigos-en-la-conservacion-del-jaguar-y-el-puma>

Navarro, E. (2016, December 5). El miedo desangra a Europa. *libertaddigital.com*. Retrieved from <https://www.libertaddigital.com/opinion/enrique-navarro/el-miedo-desengra-a-europa-80786/>

Notario, R., Vázquez Mazariego, Y., Álvarez, S. (2017, December 1). Huyendo del Homo Obesus. *Sportlife*, pp. 3.

Nuestro cerebro en la nube: el futuro que nos depara 2030. (2017, June 22). *marketing-directo.com*. Retrieved from <https://www.marketingdirecto.com/especiales/cannes-lions/cerebro-la-nube-futuro-nos-depara-2030>

Oliveira, J. (2017, March 7). Halladas en Irán las primeras evidencias culturales del Homo sapiens fuera de África. *elpaís.com*. Retrieved from [http://elpais.com/elpais/2017/03/03/ciencia/1488541294\\_139309.html#?ref=rss=simple=link](http://elpais.com/elpais/2017/03/03/ciencia/1488541294_139309.html#?ref=rss=simple=link)

Palomo, A. G. (2016, November 23). Los españoles que investigan el secreto de las manos del homo sapiens. *elmundo.es*. Retrieved from <http://www.elmundo.es/papel/cultura/2016/11/23/58331f9d46163f66348b4660.html>

Peirano, M. (2017, April 4). Nuestra lucha a muerte contra la inteligencia animal. *eldiario.es*. Retrieved from [http://www.eldiario.es/cultura/filosofia/lucha-muerte-inteligencia-animal\\_0\\_629238111.html](http://www.eldiario.es/cultura/filosofia/lucha-muerte-inteligencia-animal_0_629238111.html)

Pereña, O. (2017, August 1). El origen del hombre. *Siglo XXI*. Retrieved from <http://www.diariosigloxxi.com/texto-diario/mostrar/779433/origen-hombre>

Pérez Varela, V. M. (2017, November 10). ¿Homo Deus?: El Transhumanismo. *elfinanciero.com*. Retrieved from <http://www.elfinanciero.com.mx/opinion/homo-deus-el-transhumanismo.html>

Pilar, S. A. (2016, October 17). 'Homo deus': El largo camino del ser humano hasta alcanzar la divinidad. *rtve.es*. Retrieved from <http://www.rtve.es/noticias/20161017/homo-deus-largo-camino-del-ser-humano-hasta-alcanzar-divinidad/1426660.shtml>

Polychroniou, C. J. (2019, September 27). Noam Chomsky. La evolución del lenguaje: una perspectiva biolingüística. *kaosenlared.net*. Retrieved from <http://kaosenlared.net/noam-chomsky-la-evolucion-del-lenguaje-una-perspectiva-biolinguistica/>

¿Por qué los hombres no tenemos huesos en el pene?. (2016, December 14). *periodistadigital.com*. Retrieved from <https://www.periodistadigital.com/ciencia/ser-humano/20161214/hombres-huesos-pene-noticia-689401739745/>

Posada, J. (2017, January 5). Nichos para imbéciles. *laopiniondezamora.es*. Retrieved from <http://www.laopiniondezamora.es/opinion/2017/01/05/nichos-imbeciles/975865.html>

Quijada, P. (2016, December 16). Eudald Carbonell: «El pensamiento es la mejor herramienta creada por el ser humano». *abc.es*. Retrieved from [http://www.abc.es/ciencia/abci-eudald-carbonell-pensamiento-mejor-herramienta-creada-humano-201612160202\\_no](http://www.abc.es/ciencia/abci-eudald-carbonell-pensamiento-mejor-herramienta-creada-humano-201612160202_no)

Quijada, P. (2017, October 22). Eudald carbonell: «Los humanos que nazcan en marte originarán una nueva especie». *abc.es*. Retrieved from [http://www.abc.es/ciencia/abci-eudald-carbonell-nuestra-especie-tiene-decidir-hacia-donde-quiere-201702022053\\_noticia.html](http://www.abc.es/ciencia/abci-eudald-carbonell-nuestra-especie-tiene-decidir-hacia-donde-quiere-201702022053_noticia.html)

Rathge, E. M. (2017, September 10). Cuchara: El extraño caso del tiramisú y la evolución humana. *lacapital.com*. Retrieved from <http://www.lacapital.com.ar/mas/cuchara-el-extrano-caso-del-tiramisu-y-la-evolucion-humana-n1466984.html>

Redman, S. (2017, May 28). Lo que el fraude del hombre de Piltdown puede enseñarle a la ciencia actual. *elpais.com*. Retrieved from [http://elpais.com/elpais/2017/05/09/ciencia/1494342656\\_128129.html#?ref=rss=simple=link](http://elpais.com/elpais/2017/05/09/ciencia/1494342656_128129.html#?ref=rss=simple=link)

Requejo, F. (2017, February 27). Más 'homo' que 'sapiens'. *La Vanguardia*, pp.24.

Reuters. (2017, September 30). 'Homo sapiens' tendría hasta 350 mil años de edad. *milenio.com*. Retrieved from <https://www.milenio.com/cultura/homo-sapiens-tendria-350-mil-anos-edad>

Reyes, M. (2017, April 25). Ética y liderazgo en el mundo tecnológico. *El Economista*, pp. 4.

Riaño, P. H. (2017, April 4). Muere Giovanni Sartori, el primer gran enemigo de la televisión y de internet. *elespanol.com*. Retrieved from [http://www.elespanol.com/cultura/libros/20170404/205980010\\_0.html](http://www.elespanol.com/cultura/libros/20170404/205980010_0.html)

Robert, B. (2016, September 29). La civilización ha apaciguado la violencia innata de los humanos, según un estudio. *lasprovincias.es*. Retrieved from <http://www.lasprovincias.es/alicante/201609/29/civilizacion-apaciguado-violencia-innata-20160929012757-v.html>

Robert, B. (2016, September 29). Elon Musk quiere llevar humanos a Marte en 2022. *IDEAL*, pp. 46.

Rodríguez, B. (2016, October 19). En centenares de años habrá humanos genéticamente iguales a seres de plástico. *eldiario.es*. Retrieved from [http://www.eldiario.es/tene-rifeahora/sociedad/centenares-humanos-geneticamente-metalicos-plastico\\_0\\_569743140](http://www.eldiario.es/tene-rifeahora/sociedad/centenares-humanos-geneticamente-metalicos-plastico_0_569743140)

- Roig, P. (2016, October 23). La mutación del ser humano en 'Homo Curvus'. *Última Hora*, pp. 4.
- Rubio, J. (2017, April 19). El fuego nos cambió la cara y nos hizo trabajar durante la noche. *Diario de Navarra*, pp. 57.
- Rubio, J. (2017, April 19). Las herramientas y el lenguaje. *Diario de Navarra*, pp. 56.
- Rubio, J. (2017, April 19). ¿Por qué existen los niños?. *Diario de Navarra*, pp. 56.
- ¿Rumbo a la extinción de la humanidad? ¿Podemos salvar a la humanidad?. (2016, September 21). *rankia.com*. Retrieved from <http://www.rankia.com/blog/comstar/3335516-rumbo-extincion-humanidad-podemos-salvar>
- Sala, C. (2017, March 12). ¿Cómo combatir las falsedades del género?. *larazon.es*. Retrieved from <http://www.larazon.es/local/cataluna/como-combatir-las-falsedades-del-genero-FK14693215>
- Sampedro, J. (2016, September 25). Enredos en la familia. *El País*, pp. 2.
- Sánchez, B. (2017, September 24). Ojo de Buey. *La Rioja*, pp. 37.
- Sánchez, C. (2017, June 8). Descubrimientos en Africa de los restos de los primeros Homo Sapiens. *estrelladigital.es*. Retrieved from <http://www.estrelladigital.es/articulo/ciencia-y-tecnologia/descubrimientos-africa-restos-primeros-homo-sapiens/20170607203430322068>
- Sánchez, C. M. (2017, May 14). Transhumanismo: el último paso en la evolución humana. *xlsemanal.com*. Retrieved from <http://www.xlsemanal.com/actualidad/20150809/2045-humano-cambia-para-8737.html>
- Serón Arbeloa, F. J. (2017, November 29). En busca del desarrollo sostenible. *El Periódico de Aragón*, pp. 5.
- Serra, A. (2016, October 30). Miguel San Martín, el hombre que puede lograr la primera huella humana en Marte. *infobae.com*. Retrieved from <https://www.infobae.com/sociedad/2016/10/30/miguel-san-martin-el-hombre-que-puede-lograr-la-primer-huella-humana-en-marte/>
- Serrano Monteavaro, M. A. (2017, September 30). En los nidos de antaño. *La comarca de León*, pp. 6.
- Sobremazas, C. (2016, October 1). El Pendo tiene representada la evolución humana desde hace 80.000 años. *eldiario.es*. Retrieved from [http://www.eldiario.es/norte/cantabria/cultura/llevan-Homo-investigar-Colon-Atlantico\\_0\\_556094663.html](http://www.eldiario.es/norte/cantabria/cultura/llevan-Homo-investigar-Colon-Atlantico_0_556094663.html)
- Soriguer, F. (2017, April 19). Todas las guerras. *SUR*, pp. 7.
- Soto, Á. (2017, February 28). «Los rusos no quieren una tercera revolución en cien años». *El Diario Vasco*. Retrieved from <http://www.diariovasco.com/culturas/libros/201702/28/rusos-quieren-tercerarevolucion-20170227220610-rc.html>
- Suárez, C. (2017, June 6). Atapuerca por Juan Luis Arsuaga. *Telva*, pp. 26-28.
- Tentaciones. (2017, May 1). Mäbu y el origen del homo mosedadus en Oh! My LOL! SON Estrella Galicia. *elpais.com*. Retrieved from [http://elpais.com/elpais/2017/05/01/tentaciones/1493655716\\_133254.html](http://elpais.com/elpais/2017/05/01/tentaciones/1493655716_133254.html)
- Tom Wolfe en su hoguera de vanidad: su polémico último libro destroza a Charles Darwin y Noam Chomsky. (2016, October 1). *infobae.com*. Retrieved from <http://www.infobae.com/america/cultura-america/2016/10/01/tom-wolfe-en-su-hoguera-de-vanidad-su-ultimo-libro-destroza>
- Tormo, J. A. (2017, August 7). Darwin se equivocó. *mallorcadiario.com*. Retrieved from <http://www.mallorcadiario.com/darwin-se-equivoco>
- Travesía por la evolución humana. (2016, October 19). *El Norte de Castilla*, pp. 9.
- Un equipo internacional desvela la edad de la especie 'Homo naledi', descubierta en 2015. (2017, May 9). *ecodiario.es*. Retrieved from <https://ecodiario.economista.es/sociedad/noticias/8345065/05/17/Un-equipo-internacional-desvela-la-edad-de-la-especie-Homo-naledi-descubierta-en-2015.html>
- Un evento para dilucidar qué ocurrirá con el ser humano. (2017, June 19). *elpais.com*. Retrieved from [http://elpais.com/elpais/2017/06/16/ciencia/1497639148\\_139782.html](http://elpais.com/elpais/2017/06/16/ciencia/1497639148_139782.html)

- Urdanibia, I. (2017, April 5). Huir del cuerpo / recuperar el cuerpo. *kaosenlared.net*. Retrieved from <http://kaosenlared.net/huir-del-cuerpo-recuperar-el-cuerpo/>
- Urdin Elizaga, J. (2016, December 5). Eusocialidad disteleológica. Retrieved from <http://www.noticiasdenavarra.com/2016/12/05/opinion/tribunas/eusocialidad-disteleologica>
- Vara De Rey, F. M. (2017, April 7). Tú, robot. *estrelladigital.es*. Retrieved from <http://www.estrelladigital.es/blog/fernando.m.vara.rey/tu-robot/20170406174440317423.html>
- Vaquero, N. (2016, October 2). Juan Luis Arsuaga: Nuestra cara está hecha para la comunicación. *farodevigo.es*. Retrieved from <http://www.farodevigo.es/sociedad/2016/10/02/juan-luis-arsuaga-cara-hecha/1543889.html>
- Vega, J. (2016, December 5). Llamada al humanismo. *El Diario Montañes*, pp. 22-23.
- Velasco, E. (2017, March 07). La humanidad comenzó con la cocina. *lavanguardia.com*. Retrieved from <http://www.lavanguardia.com/ciencia/quien/20170307/42603941907/humanidad-comenzo-cocina-ferran-adria-eudald>
- Vélez, A. C. (2017, October 8). Sobre Homo Deus y su autor. *elespectador.com*. Retrieved from <http://blogs.elespectador.com/actualidad/catrecillo/homo-deus-autor>
- Vice News y Reuters (2017, June 11). Nuevo hallazgo arqueológico cambia todo lo que sabíamos sobre evolución humana. *infobae.com*. Retrieved from <https://www.infobae.com/america/vice/2017/06/11/un-nuevo-hallazgo-arqueologico-cambia-todo-lo-que-sabiamos-sobre-la-evolucion-humana/>
- Villahizán, J. (2017, April 02). Una nueva revolución. *Diario De Burgos*, pp. 57.
- Villarreal, A. (2017, April 7). ¿Quieres adelgazar de forma rápida, saludable aunque quizá ilegal? Hazte caníbal. *elespanol.com*. Retrieved from [http://www.elespanol.com/ciencia/ecologia/20170407/206729919\\_0.html](http://www.elespanol.com/ciencia/ecologia/20170407/206729919_0.html)
- Wagensberg, J. (2017, May 7). Un lobo en el Amazonas. *elperiódico.com*. Retrieved from <http://www.elperiódico.com/es/noticias/opinion/lobo-amazonas-por-jorge-wagensberg-6019095>
- Yanes, J. (2017, April 23). Ciencia semanal: el hobbit de Flores salió de África, y el cero no es mejor que el azúcar. *20minutos.es*. Retrieved from <https://blogs.20minutos.es/ciencias-mixtas/2017/04/23/ciencia-semanal-el-hobbit-de-flores-salio-de-africa-y-el-cero-no-es-mejor-que-el-azucar/>
- Yanes, J. (2017, May 13). Los humanos no estábamos solos en África. *20minutos.es*. Retrieved from <http://blogs.20minutos.es/ciencias-mixtas/2017/05/13/los-humanos-no-estabamos-solos-en-africa/>
- Yanes, J. (2017, July 26). Una antigua y desconocida especie humana se esconde en la saliva. *20minutos.es*. Retrieved from <https://blogs.20minutos.es/ciencias-mixtas/2017/07/26/una-antigua-y-desconocida-especie-humana-se-esconde-en-la-saliva/>
- Zunni, J. L. (2017, March 21). Inteligencia artificial vs. liderazgo real. *media-tics.com*. Retrieved from <https://www.media-tics.com/noticia/7348/management/inteligencia-artificial-vs.-liderazgo-real.html>
